# Supplementary material for: DNA delivery by high aspect ratio nanomaterials to algal chloroplasts
Source: Royal Society of Chemistry journal article supplement (doi:10.1039/d3en00268c), 2023-01-01
Supplement: d3en00268c1.pdf [file d3en00268c1.pdf]

# Supplementary Information

## DNA delivery by high aspect ratio nanomaterials to algal chloroplasts

Gregory M. Newkirk<sup>1</sup>, Su-Ji Jeon<sup>2</sup>, Hye-In Kim<sup>2</sup>, Supreetha Sivaraj<sup>2</sup>, Pedro De Allende<sup>1</sup>, Christopher Castillo<sup>2</sup>, Robert E. Jinkerson<sup>2,3\*</sup>, Juan Pablo Giraldo<sup>2\*</sup>

<sup>1</sup>Department of Microbiology and Plant Pathology, University of California, Riverside, CA, USA

<sup>2</sup>Department of Botany and Plant Sciences, University of California, Riverside, CA, USA

<sup>3</sup>Department of Chemical and Environmental Engineering, University of California, Riverside, CA, USA

**\* Correspondence:**

[juanpablo.giraldo@ucr.edu](mailto:juanpablo.giraldo@ucr.edu)

[robert.jinkerson@ucr.edu](mailto:robert.jinkerson@ucr.edu)

**Keywords:** biotechnology, chloroplast, algae, carbon nanotubes, gene delivery

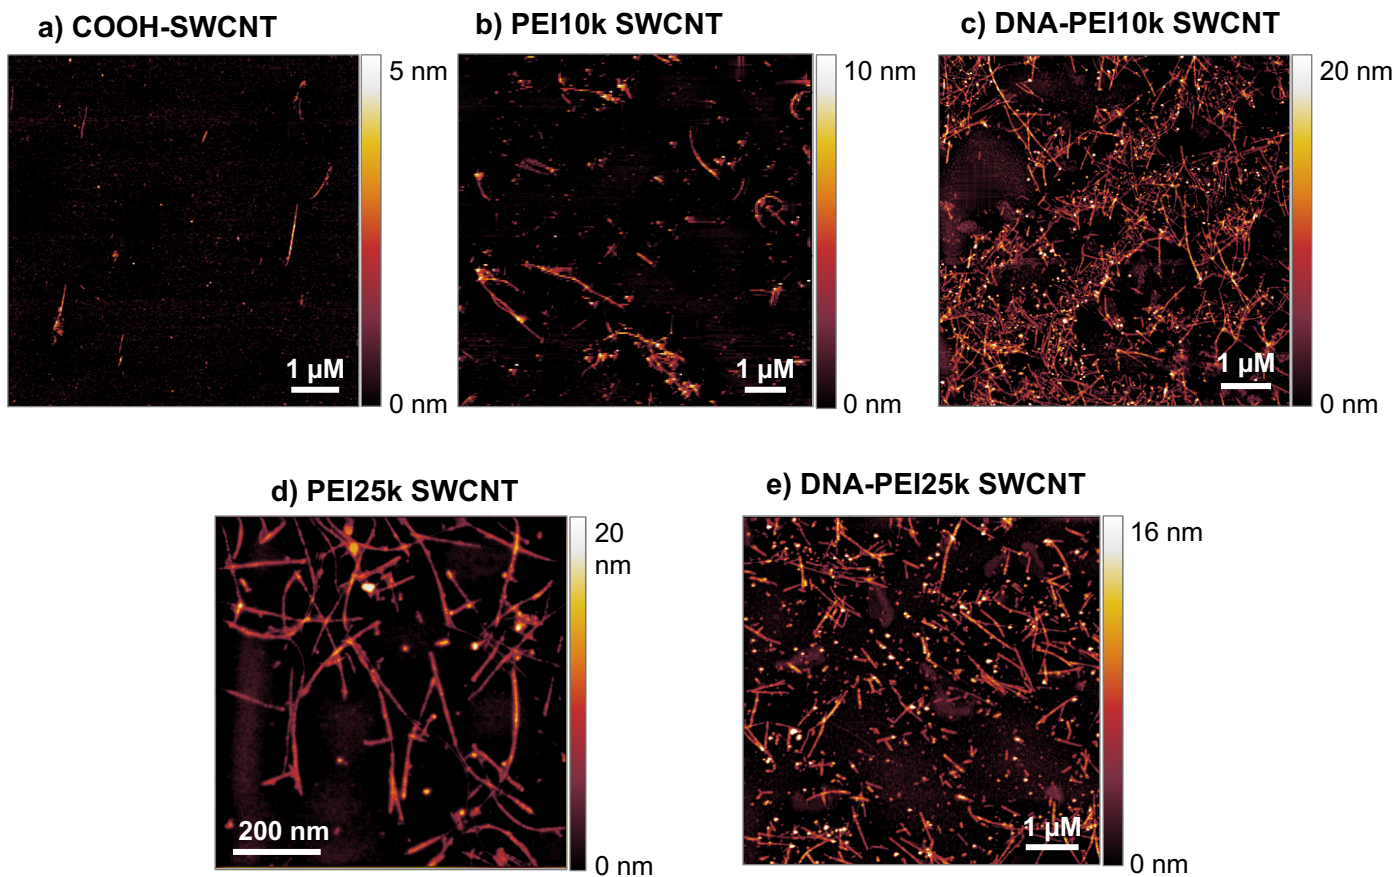

**Supplementary Figure 1.** AFM images of a) COOH-SWCNT, b) PEI10k SWCNT c) GT<sub>15</sub> ssDNA coated PEI10k-SWCNT, d) PEI25k SWCNT, e) GT<sub>15</sub> ssDNA coated PEI25k-SWCNT collected by tapping mode.

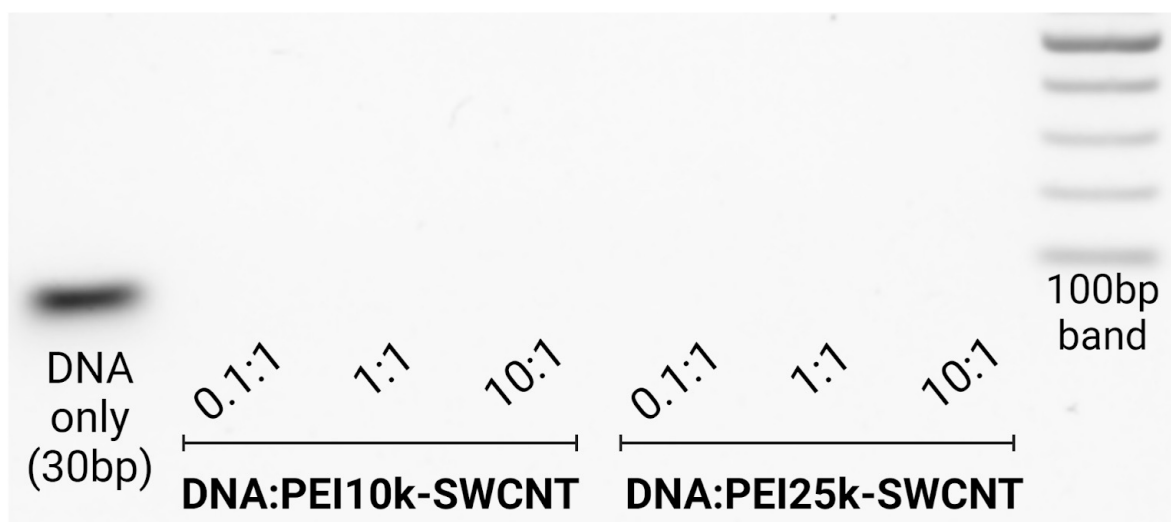

**Supplementary Figure 2. Nanomaterial characterization of ssDNA binding efficiency.** Gel electrophoresis with 1% TBE agarose gel of 0.1:1, 1:1 and 10:1 mass ratios of GT<sub>15</sub>:PEI-SWCNT for DNA loading efficiency quantification after a 1 hour binding reaction shows 100% binding to PEI10k- and PEI25k-SWCNT.

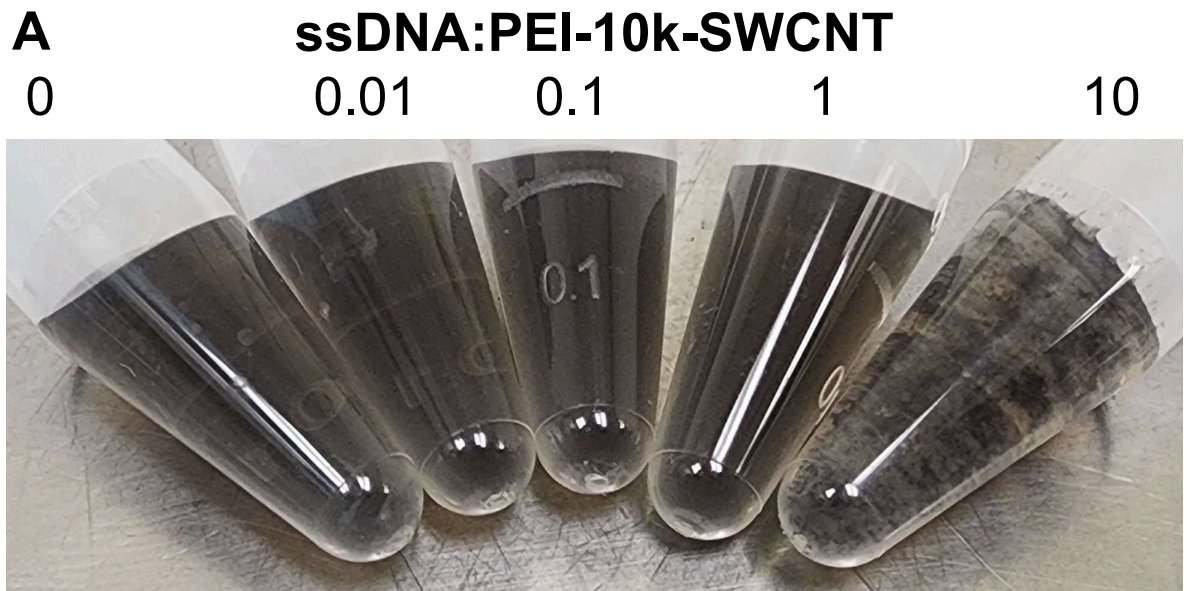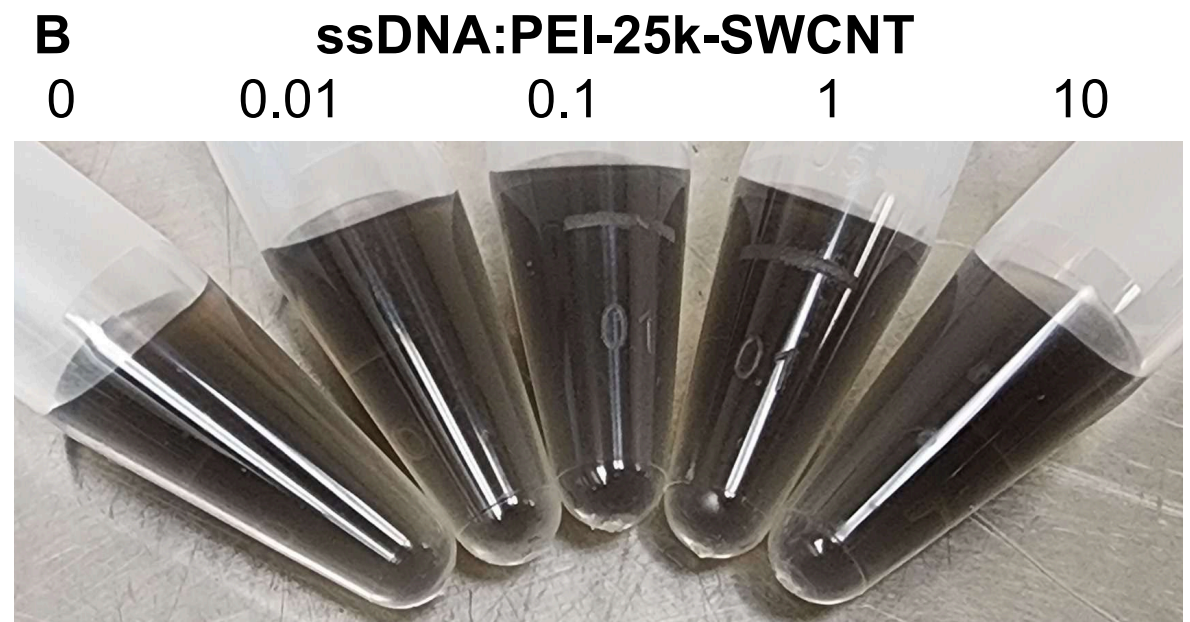

**Supplementary Figure 3. Aggregation of ssDNA-PEI-SWCNT at high ssDNA:PEI-SWCNT ratio.** a) PEI10k-SWCNT visibly aggregated at a 10:1 ratio of ssDNA:PEI-SWCNT, while b) PEI25k-SWCNT did not show any visible signs of aggregation at any of the testing ratios.



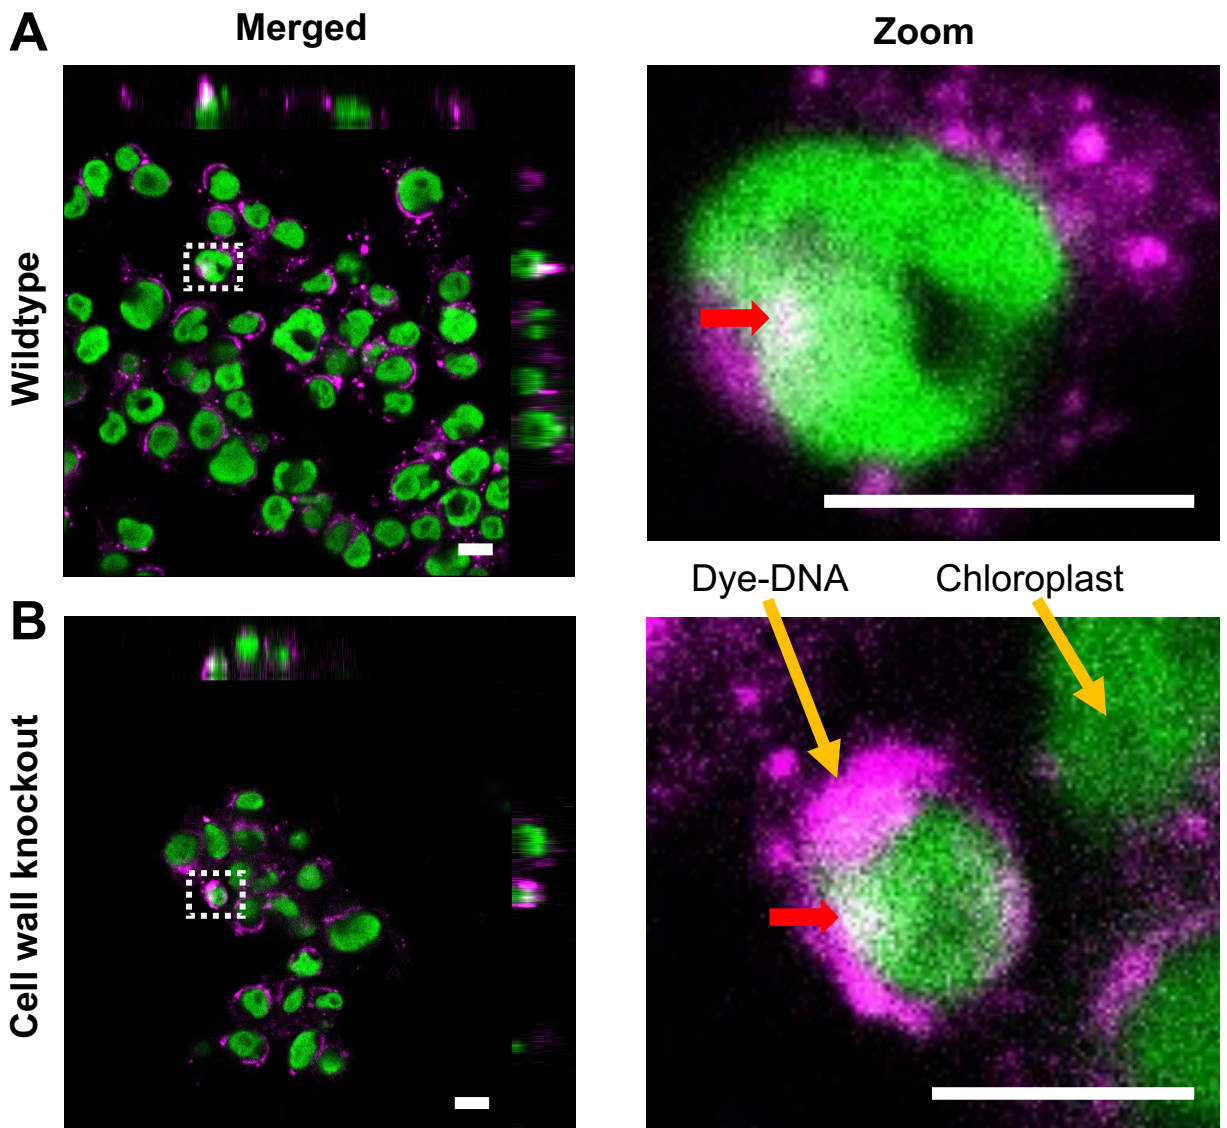

**Supplementary Figure 4. Colocalization of Dye-DNA delivered by PEI10k-SWCNT within algae chloroplasts.** Dye-DNA-PEI10k-SWCNTs colocalization with chloroplasts in the a) wildtype and b) cell wall knockout strain, after 1 hour incubation with 300 fg/cell of PEI10k-SWCNTs at a 1:1 Dye-DNA:SWCNT ratio (n=5). The scale bar is 10  $\mu$ m. Overlap between Dye-DNA and chloroplasts is highlighted in the orthogonal views representing projections on the z-axis. Red arrows indicate areas of overlap.

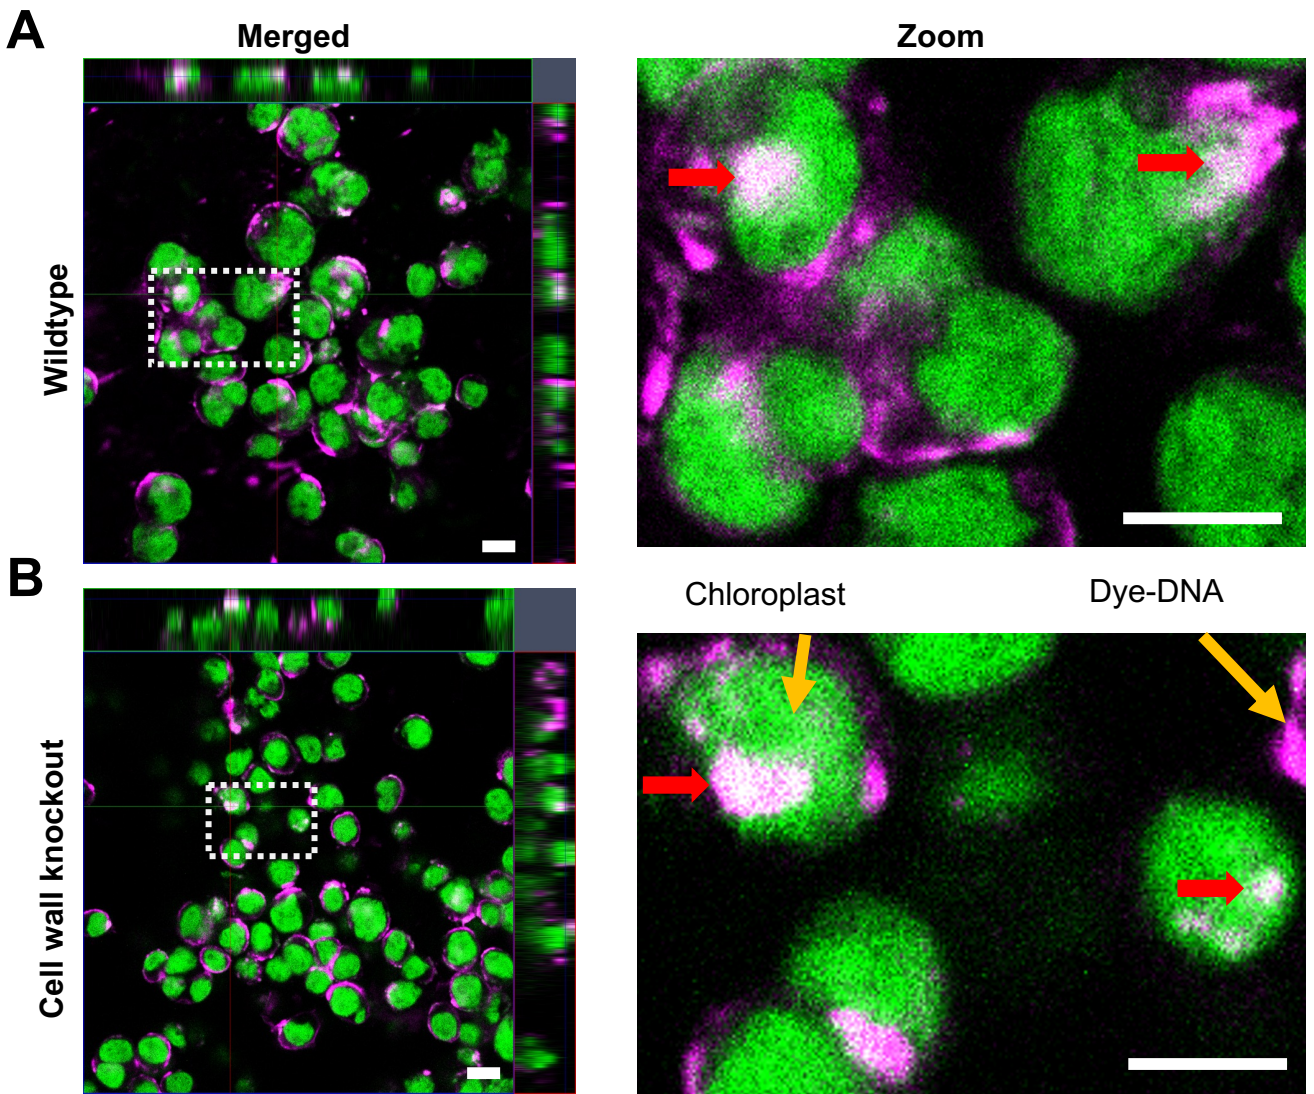

**Supplementary Figure 5. Colocalization of Dye-DNA delivered by PEI25k-SWCNT within algae chloroplasts.** Dye-DNA-PEI25k-SWCNTs colocalization with chloroplasts in the a) wildtype and b) cell wall knockout strain, after a 1 hour incubation with 300 fg/cell of PEI25k-SWCNTs with a 1:1 Dye-DNA:SWCNT ratio (n=5). The scale bar is 10  $\mu\text{m}$ . Overlap between Dye-DNA and chloroplasts is highlighted in the orthogonal views representing projections on the z-axis. Red arrows indicate areas of overlap.





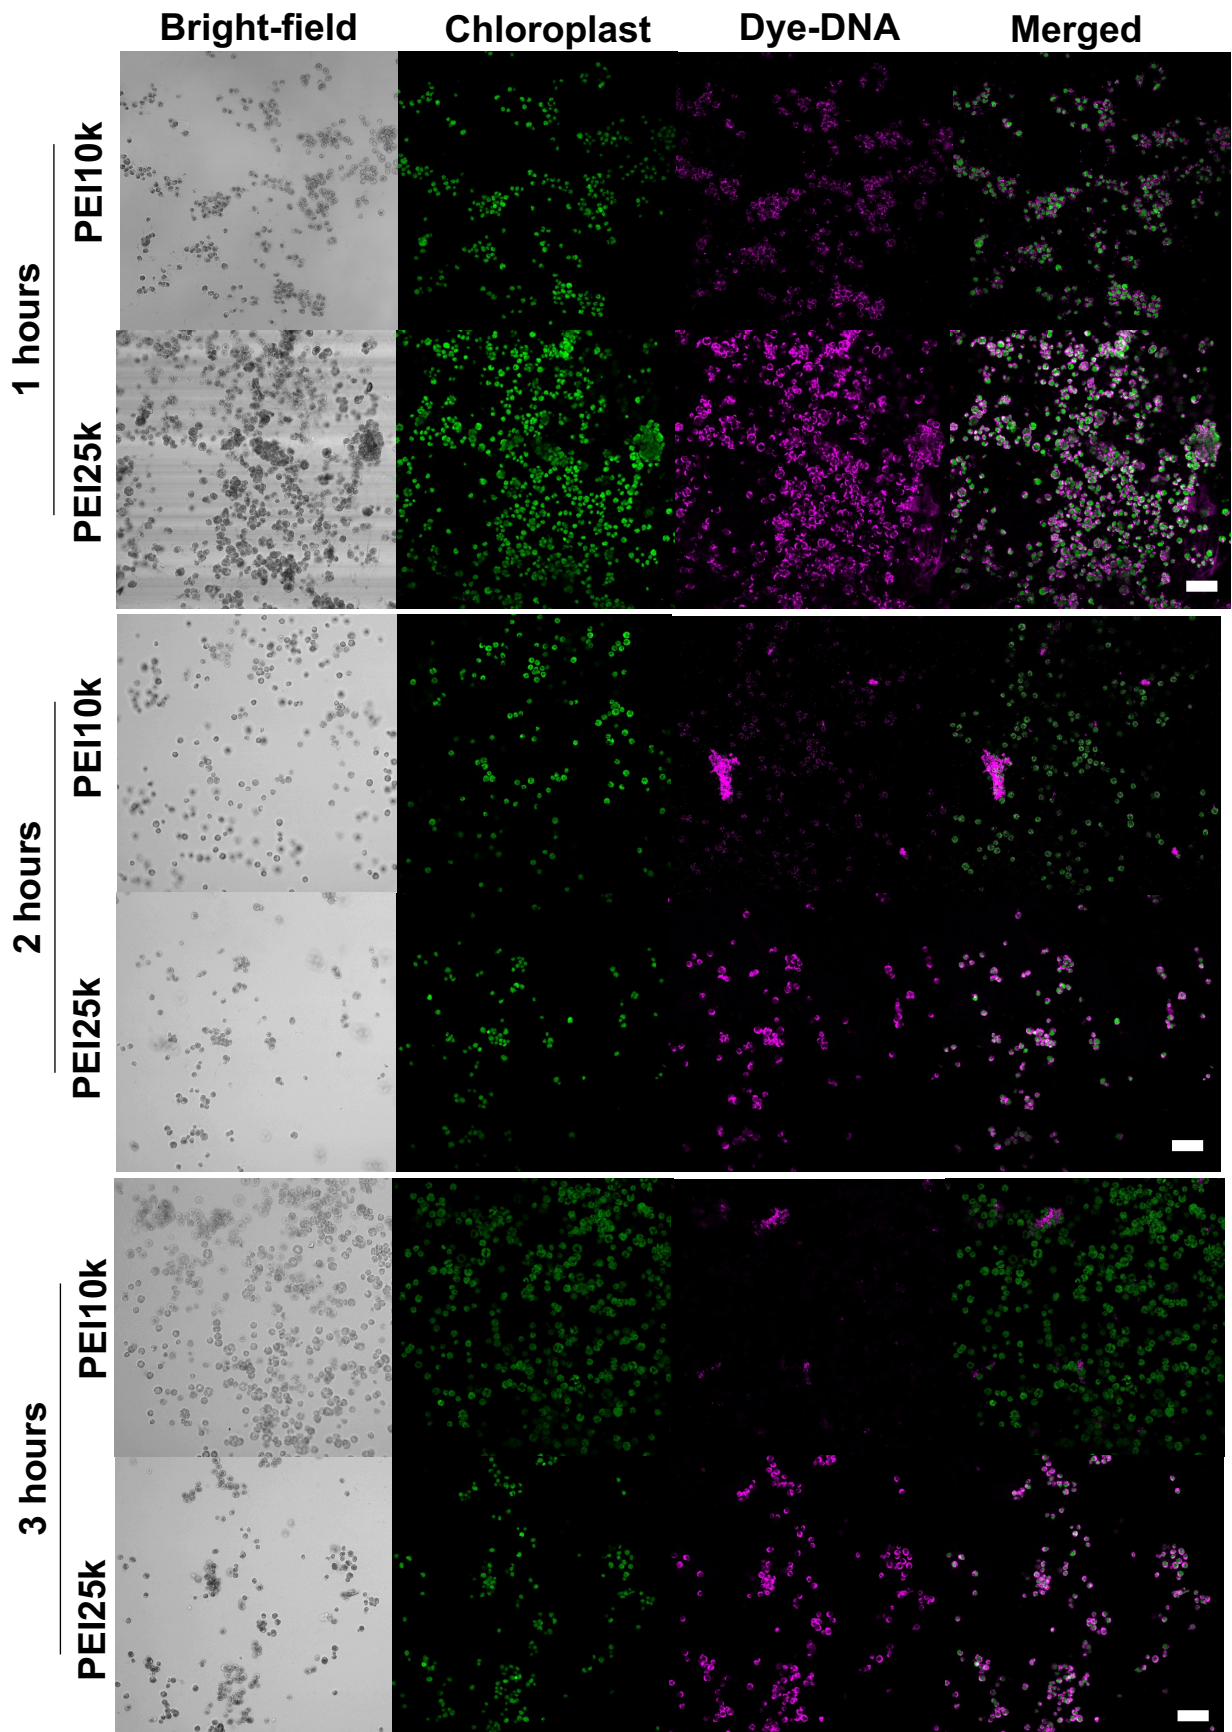

**Supplementary Figure 7. Population-level wildtype algae with Dye-DNA-PEI10k-SWCNT and -PEI25k-SWCNT confocal microscopy across multiple time points.** Higher colocalization between chloroplasts and dye-DNA is observed in PEI25k than in PEI10k SWCNT-treated algae at 300 fg/cell and 1:1 mass ratio of DNA:PEI-SWCNT. Representative population-level image; scale bar is 50  $\mu$ m.

Bright-field

Chloroplast

Dye-DNA

Merged

1 hours

PEI10k

PEI25k

2 hours

PEI10k

PEI25k

3 hours

PEI10k

PEI25k

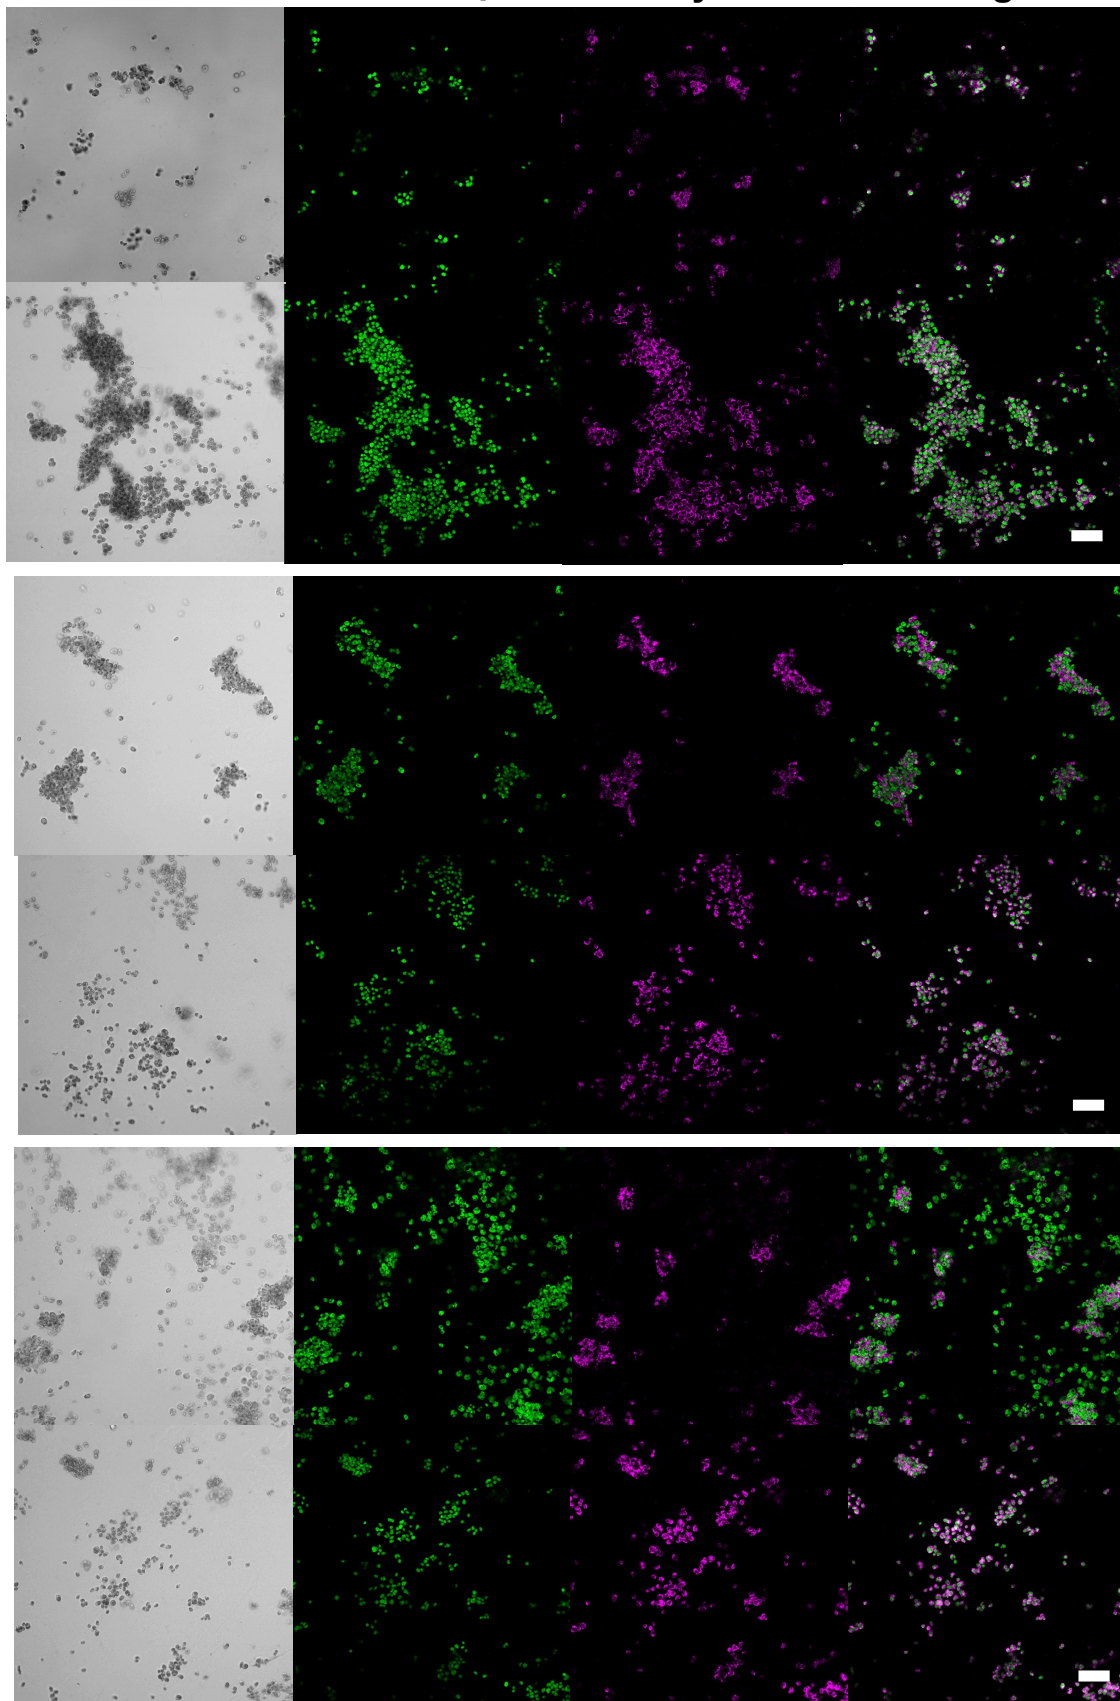

**Supplementary Figure 8. Population-level cell wall knockout algae with Dye-DNA-PEI10k-SWCNT and -PEI25k-SWCNT confocal microscopy across multiple time points.** Higher colocalization between chloroplasts and dye-DNA is observed in PEI25k than in PEI10k SWCNT-treated algae at 300 fg/cell and 1:1 mass ratio of DNA:PEI-SWCNT. Representative population-level image; scale bar is 50  $\mu$ M.



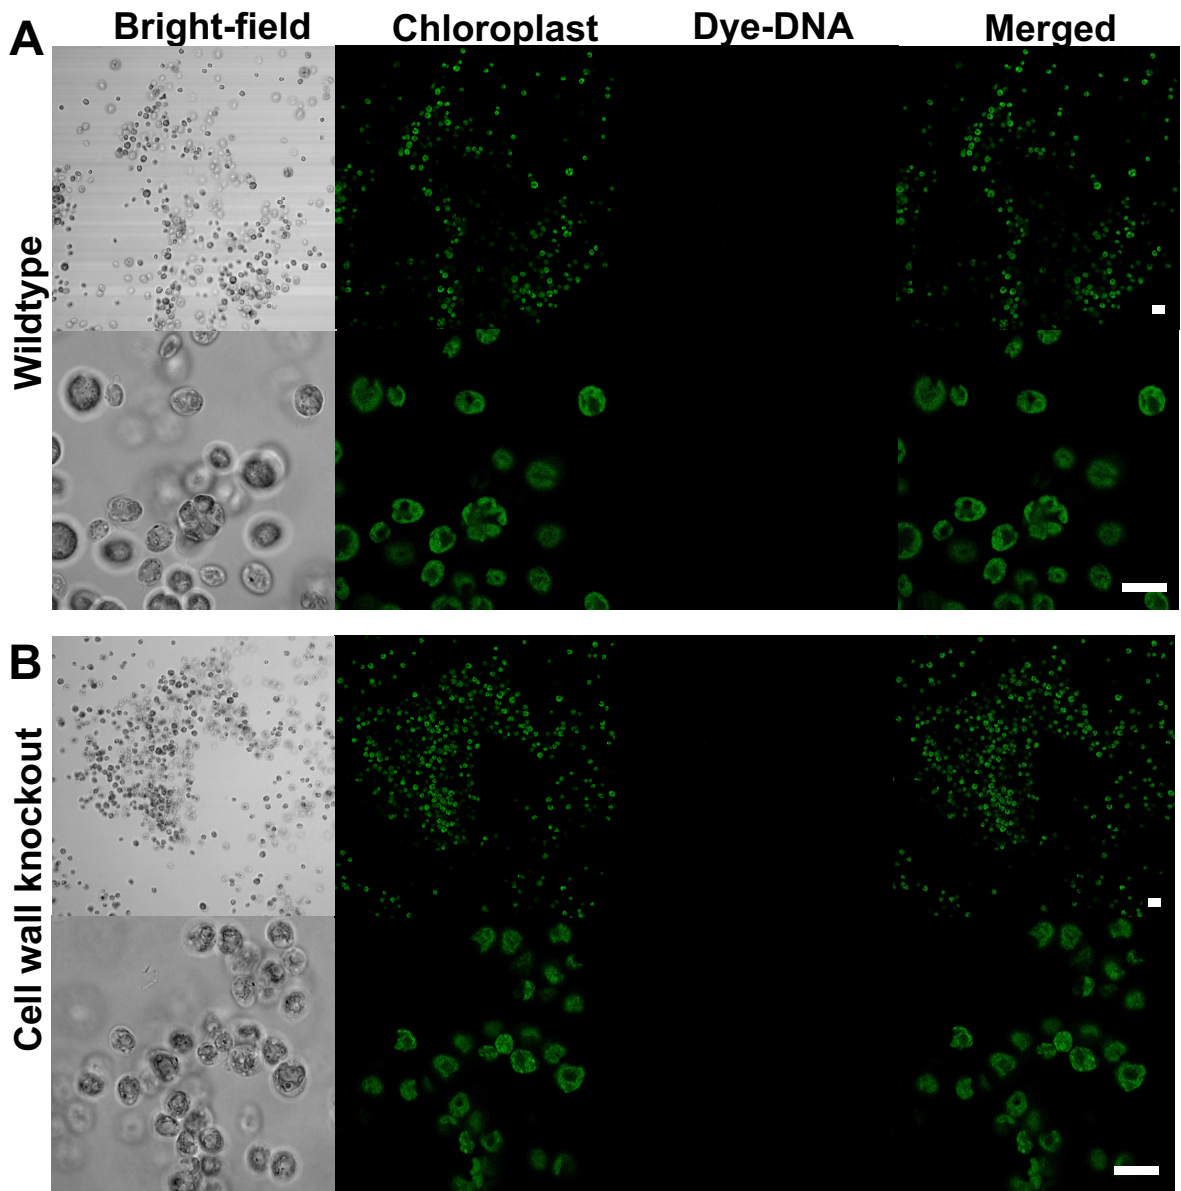

**Supplementary Figure 9. Dye-DNA without PEI-SWCNT does not associate with algae.** No Dye-DNA fluorescence was found in either a) wildtype or b) cell wall knockout algae exposed to the negative control without PEI-SWCNTs. The scale bar is 20  $\mu\text{m}$ .

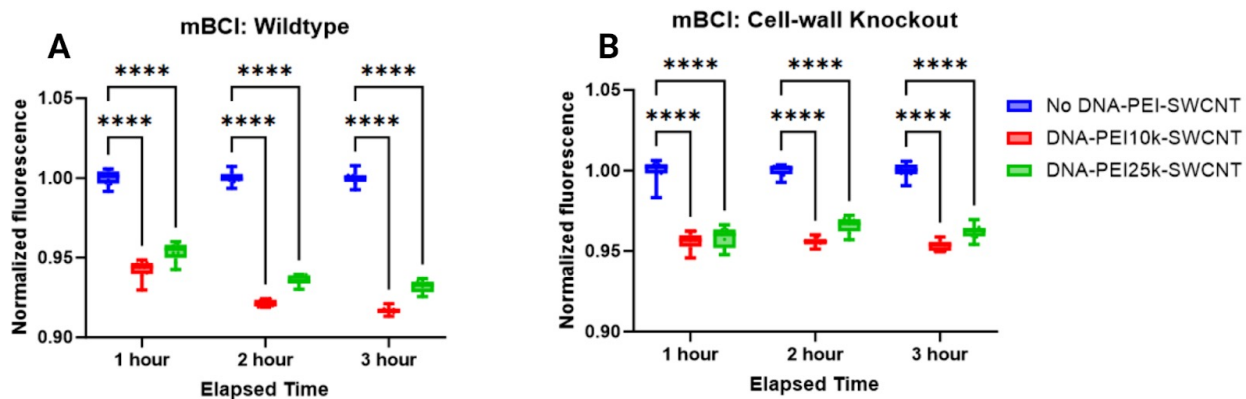

**Supplementary Figure 10. Reduced Glutathione (GSH) upon reaction with ROS generated after DNA-PEI-SWCNT exposure.** Monochlorobimane (mBCl) assay indicated that intracellular reduced Glutathione (GSH) levels decrease within one hour in response to both DNA-PEI10k- and DNA-PEI25k-SWCNT in a) wildtype and b) cell wall knockout strain (ANOVA one way test, \*\*\*\*P < 0.0001)(n=3). Glutathione is an antioxidant molecule used by algae cells to regulate ROS levels.

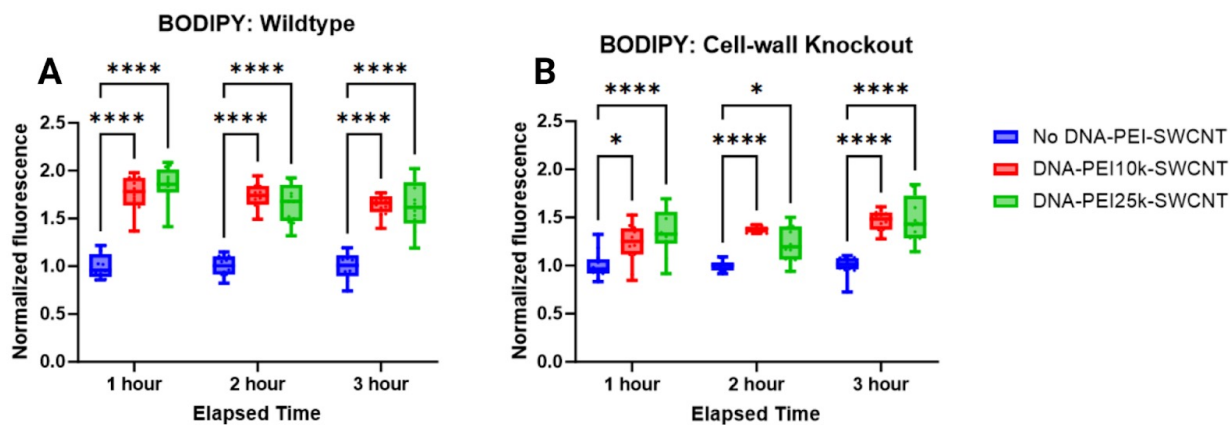

**Supplementary Figure 11. Lipid peroxidase assay detects damage to lipid membranes due to reaction with ROS.** BODIPY C11 identified an increase in lipid oxidation in algae after exposure to 300 fg/cell DNA-PEI-SWCNT in 1:1 ratio to DNA:PEI-SWCNT by mass. a ) Wildtype and b) cell-wall knockout strains both showed statistically significant higher levels of lipid peroxidation, \* $P < 0.05$  and \*\*\*\* $P < 0.0001$ , respectively, when exposed to PEI-10k-SWCNT and PEI-25k-SWCNT (ANOVA one-way test;  $n=3$ , technical triplicate) indicating ROS damage in lipid membranes and impact on membrane integrity.

**Supplementary Table 1.** Zeta potentials of PEI10k- and PEI25k-SWCNT in the presence of various ssDNA concentrations (10 mM final TE buffer, pH 8.0).

| DNA:PEI-SWCNT | PEI 10k    | PEI 25k    |
|---------------|------------|------------|
| No DNA        | 14.5 ± 2.0 | 30.1 ± 2.0 |
| 0.01:1        | 14.7 ± 1.8 | 28.8 ± 2.0 |
| 0.1:1         | 14.6 ± 1.8 | 29.8 ± 1.7 |
| 1:1           | 17.0 ± 1.6 | 30.6 ± 2.9 |
